# Supplementary material
Source: publisher figshare collection journal article supplement (https://acs.figshare.com/ndownloader/files/8560990)
Supplement: Supplementary file 1 [file 8560990]

## Electronic Supplementary Information

### In-situ grown Fe<sub>2</sub>O<sub>3</sub> single crystallites on reduced graphene oxide nanosheets as high performance conversion anode for sodium-ion batteries

*Ting Li, <sup>†</sup> Aiqiong Qin, <sup>†</sup> Lanlan Yang, <sup>‡</sup> Jie Chen, <sup>†</sup> Qiufan Wang, <sup>†</sup> Daohong Zhang\**

*<sup>†</sup>and Hanxi Yang<sup>\*,‡</sup>*

<sup>†</sup>Key Laboratory of Catalysis and Materials Science of the State Ethnic Affairs Commission & Ministry of Education, College of Chemistry and Materials Science, South-Central University for Nationalities, Wuhan, 430074, P. R. China.

<sup>‡</sup>College of Chemistry and Molecular Sciences, Wuhan University, Wuhan 430072, China.

#### Corresponding Author

\* Daohong Zhang (E-mail: zhangdh27@163.com.)

\*Hanxi Yang (E-mail: hxyang@whu.edu.cn.)

## 1. The morphology of pure $\text{Fe}_2\text{O}_3$ crystals

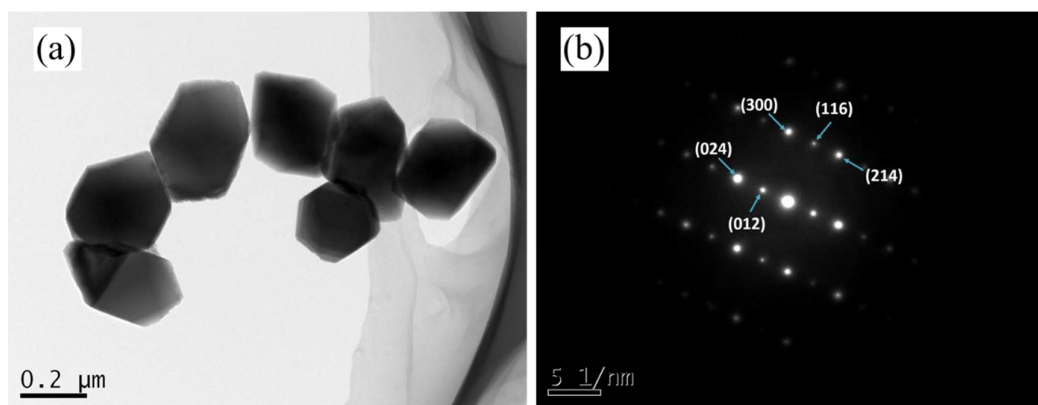

**Fig. S-1** (a) TEM image and (b) SAED pattern of pure  $\text{Fe}_2\text{O}_3$  crystals.

## 2. Charge/discharge performance of the $\text{Fe}_2\text{O}_3/\text{rGO}$ electrode

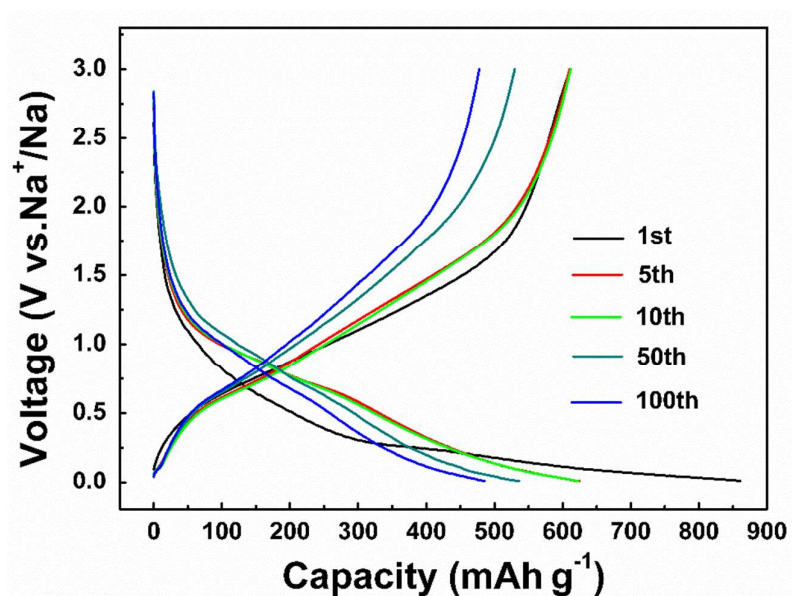

**Fig. S-2** Discharge/charge profiles of the  $\text{Fe}_2\text{O}_3/\text{rGO}$  electrode between 0.01 and 3.00 V at the 1st, 5th, 10th, 50th, and 100th cycle at a current density of 50  $\text{mA g}^{-1}$ .

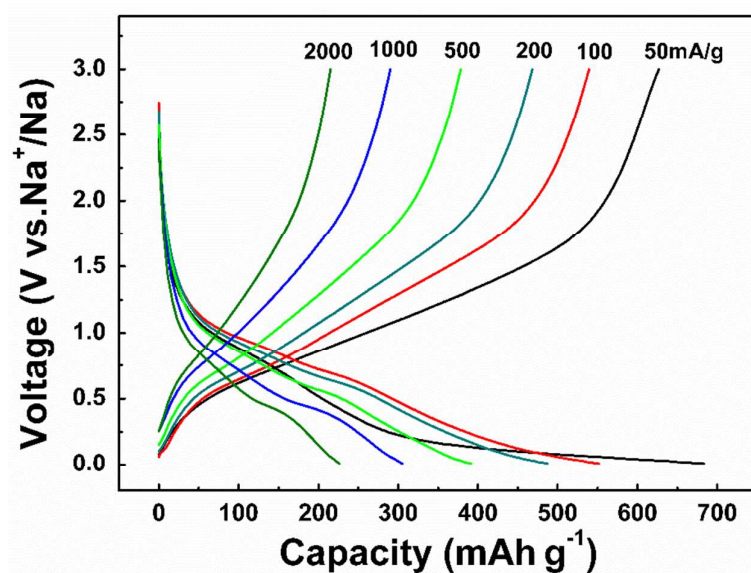

**Fig. S-3** Discharge/charge profiles of the  $\text{Fe}_2\text{O}_3/\text{rGO}$  electrode between 0.01 and 3.00 V at various current densities.

### 3. Electrochemical performance of pure rGO electrode

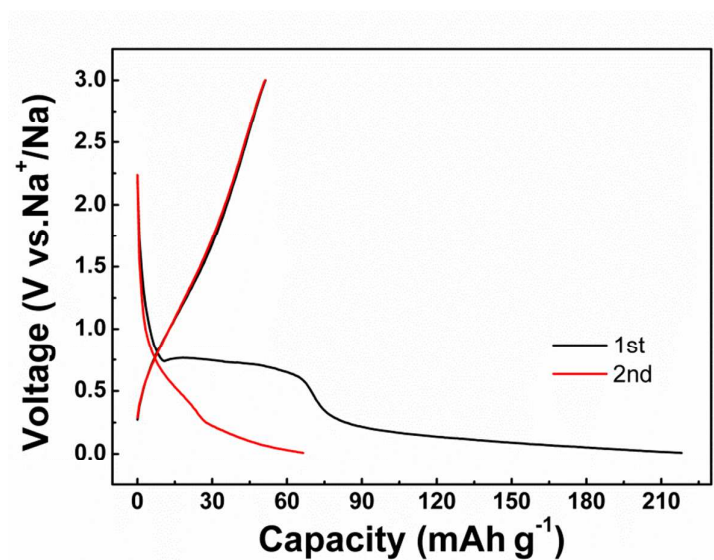

**Fig. S-4** Discharge/charge profiles of pure rGO electrode between 0.01 and 3.00 V at a current density of 50  $\text{mA g}^{-1}$ .

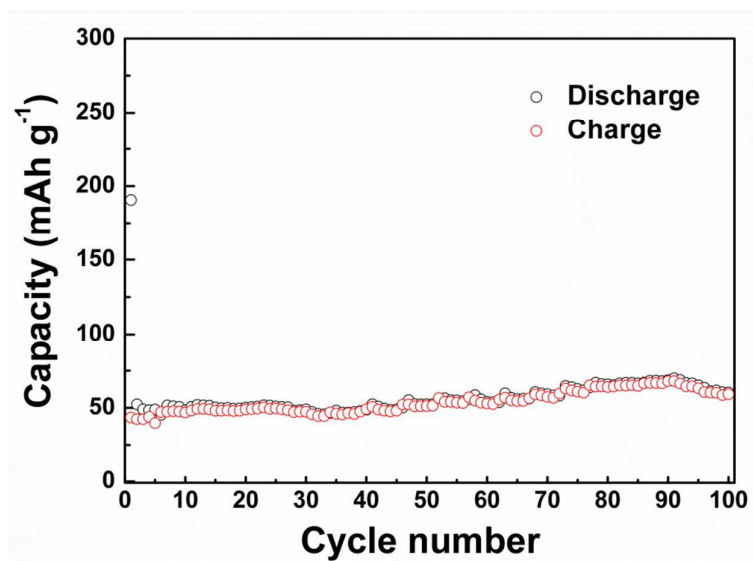

**Fig. S-5** Cycling performance of pure rGO electrode at a current of 50 mA/g.

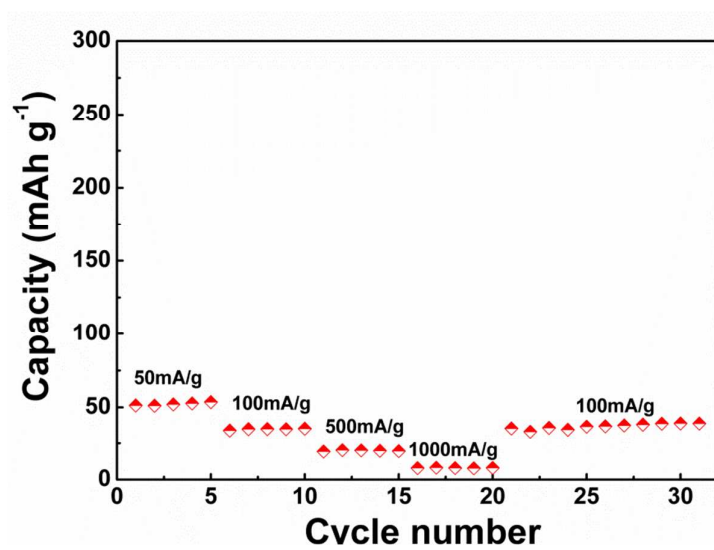

**Fig. S-6** Rate capability of pure rGO electrode at various current densities

#### 4. Charge/discharge performance of the pure $\text{Fe}_2\text{O}_3$ electrode

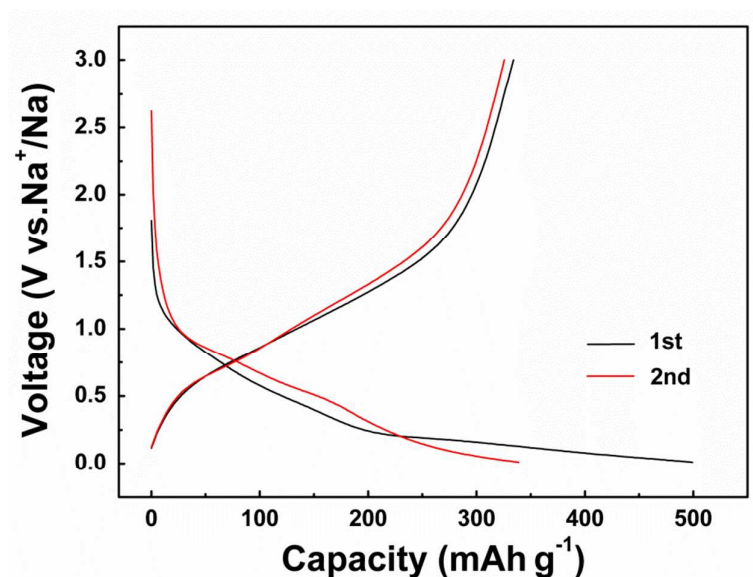

**Fig. S-7** Discharge/charge profiles of pure  $\text{Fe}_2\text{O}_3$  electrode between 0.01 and 3.00 V at a current density of  $50 \text{ mA g}^{-1}$
